# Supplementary material
Source: Springer Nature journal article supplement (https://www.springermedizin.de/resource/supplementary/13012_2013_604_MOESM1_ESM.pdf/9630370)
Supplement: MOESM1 [file 9630370]

## Inner Context

### Organizational variables

Organizational culture  
Organizational climate  
Implementation climate

### Leader-level variables

Transformational leadership  
Knowledge  
Attitudes

Outer Context: System Level  
Policy from the Department of  
Behavioral Health

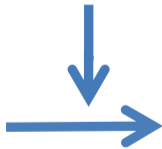

Implementation of evidence-based treatments (*i.e.*, fidelity to evidence-based treatment techniques and training in evidence-based treatments)
